# Supplementary material for: Infrared Thermal Imaging as a Novel Non-Invasive Point-of-Care Tool to Assess Filarial Lymphoedema
Source: MDPI journal article supplement (doi:10.3390/jcm10112301), 2021-05-25
Supplement: s1 [file s1]

**Table S2.** Temperature data related to ADLA status by lymphoedema stage

| Measurement site   | Temperature | 95% CI        |
|--------------------|-------------|---------------|
| <b>Shin</b>        |             |               |
| Stage 0, no ADLA   | 34.52       | 34.22 - 34.83 |
| Stage 0, ADLA      | 35.01       | 34.84 - 35.19 |
| stage 1, no ADLA   | 34.53       | 34.13 - 34.94 |
| Stage 1, ADLA      | 35.02       | 34.85 - 35.19 |
| Stage 2, no ADLA   | 34.66       | 34.31 - 35.01 |
| Stage 2, ADLA      | 35.15       | 34.90 - 35.40 |
| stage 3, no ADLA   | 35.14       | 34.79 - 35.49 |
| Stage 3, ADLA      | 35.63       | 35.42 - 35.85 |
|                    |             |               |
| <b>Ankle</b>       |             |               |
| Stage 0, no ADLA   | 33.90       | 33.45 - 34.35 |
| Stage 0, ADLA      | 34.56       | 34.28 - 34.83 |
| stage 1, no ADLA   | 34.13       | 33.68 - 34.59 |
| Stage 1, ADLA      | 34.79       | 34.54 - 35.04 |
| Stage 2, no ADLA   | 34.14       | 33.7 - 34.58  |
| Stage 2, ADLA      | 34.80       | 34.51 - 35.09 |
| stage 3, no ADLA   | 35.03       | 34.62 - 35.44 |
| Stage 3, ADLA      | 35.69       | 35.44 - 35.93 |
|                    |             |               |
| <b>Toes</b>        |             |               |
| Stage 0, no ADLA   | 33.78       | 33.23 - 34.33 |
| Stage 0, ADLA      | 34.56       | 34.18 - 34.94 |
| stage 1, no ADLA   | 34.05       | 33.59 - 34.50 |
| Stage 1, ADLA      | 34.83       | 34.47 - 35.18 |
| Stage 2, no ADLA   | 34.09       | 33.65 - 34.53 |
| Stage 2, ADLA      | 34.87       | 34.55 - 35.19 |
| stage 3, no ADLA   | 34.89       | 34.45 - 35.33 |
| Stage 3, ADLA      | 35.67       | 35.41 - 35.93 |
|                    |             |               |
| <b>Close Ankle</b> |             |               |
| Stage 0, no ADLA   | 34.02       | 33.65 - 34.40 |
| Stage 0, ADLA      | 34.69       | 34.51 - 34.86 |
| stage 1, no ADLA   | 34.22       | 33.80 - 34.65 |
| Stage 1, ADLA      | 34.88       | 34.65 - 35.11 |
| Stage 2, no ADLA   | 34.35       | 33.99 - 34.71 |
| Stage 2, ADLA      | 35.01       | 34.73 - 35.30 |
| stage 3, no ADLA   | 35.18       | 34.83 - 35.54 |
| Stage 3, ADLA      | 35.85       | 35.64 - 36.05 |
|                    |             |               |
| <b>Close Toes</b>  |             |               |
| Stage 0, no ADLA   | 33.78       | 33.23 - 34.33 |
| Stage 0, ADLA      | 34.56       | 34.18 - 34.94 |
| stage 1, no ADLA   | 34.05       | 33.59         |

|                  |       |               |
|------------------|-------|---------------|
| Stage 1, ADLA    | 34.83 | 34.47 - 35.18 |
| Stage 2, no ADLA | 34.09 | 33.65 - 34.50 |
| Stage 2, ADLA    | 34.87 | 34.55 - 35.19 |
| stage 3, no ADLA | 34.89 | 34.45 - 35.33 |
| Stage 3, ADLA    | 35.67 | 35.41 - 35.93 |
|                  |       |               |
| <b>Back</b>      |       |               |
| <b>Back knee</b> |       |               |
| Stage 0, no ADLA | 34.62 | 34.38 - 34.86 |
| Stage 0, ADLA    | 34.94 | 34.78 - 35.09 |
| stage 1, no ADLA | 34.75 | 34.47 - 35.03 |
| Stage 1, ADLA    | 35.07 | 34.88 - 35.25 |
| Stage 2, no ADLA | 34.91 | 34.62 - 35.20 |
| Stage 2, ADLA    | 35.23 | 35.05 - 35.41 |
| stage 3, no ADLA | 35.25 | 34.97 - 35.53 |
| Stage 3, ADLA    | 35.57 | 35.36 - 35.78 |
|                  |       |               |
| <b>Calf</b>      |       |               |
| Stage 0, no ADLA | 33.80 | 33.59 - 34.02 |
| Stage 0, ADLA    | 34.43 | 34.27 - 34.60 |
| stage 1, no ADLA | 33.97 | 33.76 - 34.19 |
| Stage 1, ADLA    | 34.60 | 34.42 - 34.78 |
| Stage 2, no ADLA | 34.11 | 33.97 - 34.26 |
| Stage 2, ADLA    | 34.74 | 34.52 - 34.96 |
| stage 3, no ADLA | 34.50 | 34.29 - 34.71 |
| Stage 3, ADLA    | 35.13 | 34.95 - 35.32 |
|                  |       |               |
| <b>Heel</b>      |       |               |
| Stage 0, no ADLA | 33.00 | 32.63 - 33.36 |
| Stage 0, ADLA    | 34.08 | 33.79 - 34.37 |
| stage 1, no ADLA | 33.16 | 32.87 - 33.46 |
| Stage 1, ADLA    | 34.24 | 33.97 - 34.52 |
| Stage 2, no ADLA | 33.32 | 33.02 - 33.63 |
| Stage 2, ADLA    | 34.41 | 34.12 - 34.69 |
| stage 3, no ADLA | 33.97 | 33.65 - 34.29 |
| Stage 3, ADLA    | 35.05 | 34.83 - 35.28 |
|                  |       |               |
