# Supplementary material for: Infrared Thermal Imaging as a Novel Non-Invasive Point-of-Care Tool to Assess Filarial Lymphoedema
Source: MDPI journal article supplement (doi:10.3390/jcm10112301), 2021-05-25
Supplement: s1 [file s1]

**Table S1.** Temperature data related to lymphoedema stage

| Measurement Site   | Lymphoedema Stage | Mean Temperature | 95% CI      |
|--------------------|-------------------|------------------|-------------|
| <b>Shin</b>        | 0                 | 34.9             | 34.7 - 35.1 |
|                    | 1                 | 34.9             | 34.7 - 35.2 |
|                    | 2                 | 35.0             | 34.8 - 35.3 |
|                    | 3                 | 35.5             | 35.3 - 35.8 |
|                    | Mean              | 35.1             |             |
|                    |                   |                  |             |
| <b>Ankle</b>       | 0                 | 34.4             | 34.1 - 34.7 |
|                    | 1                 | 34.7             | 34.4 - 34.9 |
|                    | 2                 | 34.7             | 34.4 - 35.0 |
|                    | 3                 | 35.6             | 35.3 - 35.8 |
|                    | Mean              | 34.9             |             |
|                    |                   |                  |             |
| <b>Toes</b>        | 0                 | 34.4             | 34.0 - 34.8 |
|                    | 1                 | 34.7             | 34.3 - 35.0 |
|                    | 2                 | 34.7             | 34.4 - 35.0 |
|                    | 3                 | 35.5             | 35.3 - 35.8 |
|                    | Mean              | 34.8             |             |
|                    |                   |                  |             |
| <b>Close Ankle</b> | 0                 | 34.5             | 34.3 - 34.8 |
|                    | 1                 | 34.7             | 34.5 - 35.0 |
|                    | 2                 | 34.9             | 34.6 - 35.2 |
|                    | 3                 | 35.7             | 35.5 - 35.9 |
|                    | Mean              | 35.0             |             |
|                    |                   |                  |             |
| <b>Close Toes</b>  | 0                 | 34.3             | 33.9 - 34.8 |
|                    | 1                 | 34.7             | 34.4 - 35.0 |
|                    | 2                 | 34.7             | 34.3 - 35.1 |
|                    | 3                 | 35.6             | 35.4 - 35.8 |
|                    | Mean              | 34.8             |             |
|                    |                   |                  |             |
| <b>Back knee</b>   | 0                 | 34.9             | 34.7 - 35.0 |
|                    | 1                 | 35.0             | 34.8 - 35.2 |
|                    | 2                 | 35.2             | 35.0 - 35.3 |
|                    | 3                 | 35.5             | 35.3 - 35.7 |
|                    | Mean              | 35.2             |             |
|                    |                   |                  |             |
| <b>Calf</b>        | 0                 | 34.3             | 34.1 - 34.5 |
|                    | 1                 | 34.5             | 34.3 - 34.7 |
|                    | 2                 | 34.6             | 34.4 - 34.8 |
|                    | 3                 | 35.0             | 34.8 - 35.2 |
|                    | Mean              | 34.6             |             |
|                    |                   |                  |             |

|             |      |      |             |
|-------------|------|------|-------------|
|             |      |      |             |
| <b>Heel</b> | 0    | 33.9 | 33.5 - 34.2 |
|             | 1    | 34.0 | 33.7 - 34.3 |
|             | 2    | 34.2 | 33.9 - 34.5 |
|             | 3    | 34.8 | 34.6 - 35.0 |
|             | Mean | 34.2 |             |
