# Supplementary figures and images for: Infrared Thermal Imaging as a Novel Non-Invasive Point-of-Care Tool to Assess Filarial Lymphoedema
Source: MDPI journal article supplement (doi:10.3390/jcm10112301), 2021-05-25

**Figure S1:** Camera set up for taking images of participants lower legs

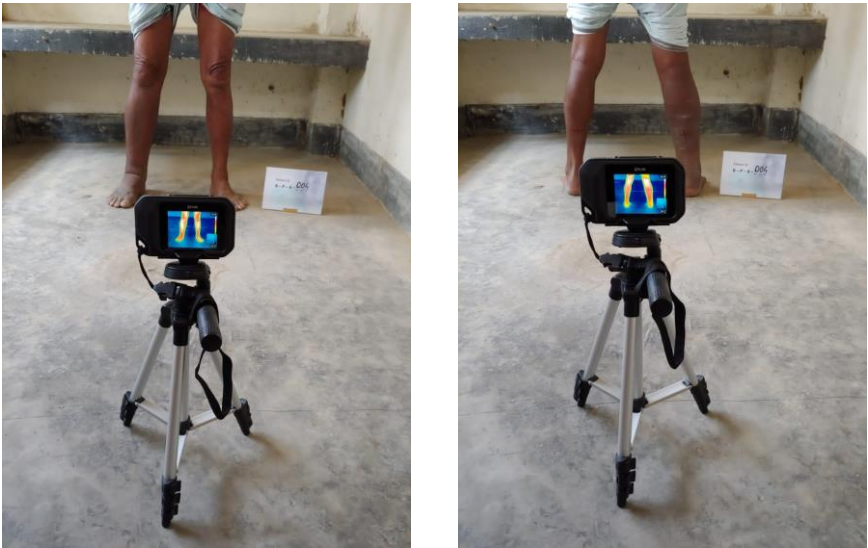

Supplement: s1 [file s1]

Figure S2: Figure 2 - larger images

Participant 1.

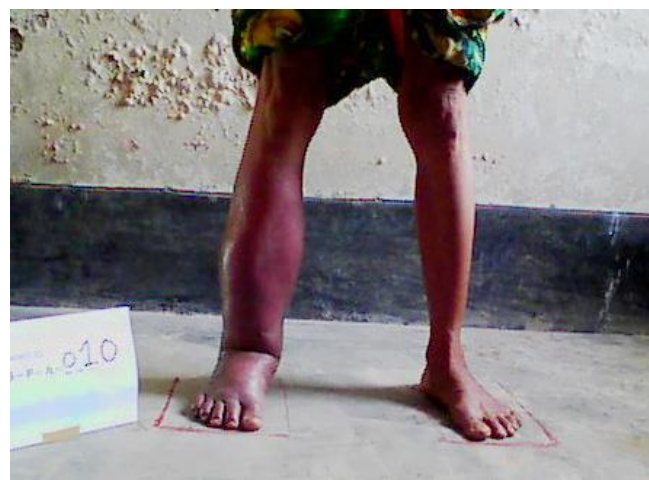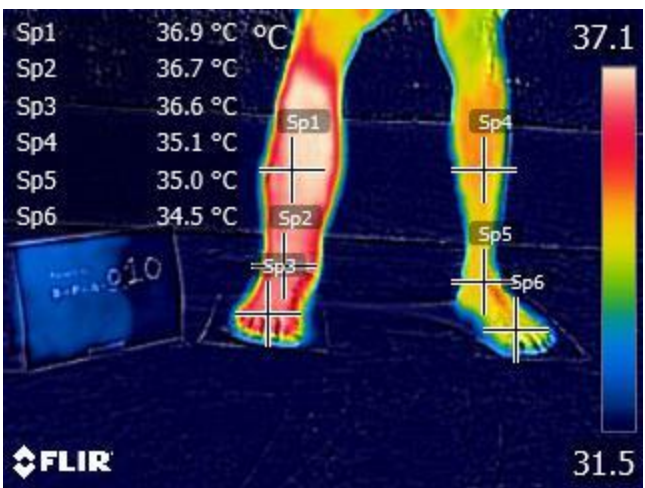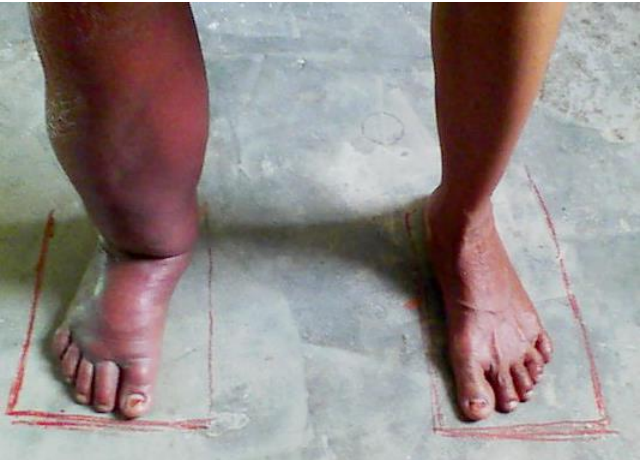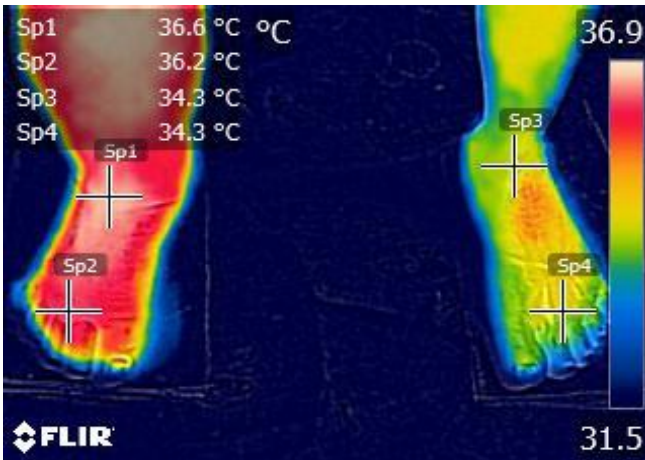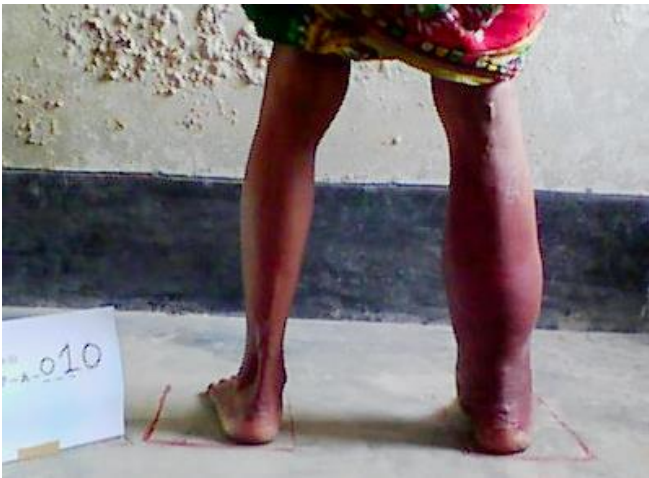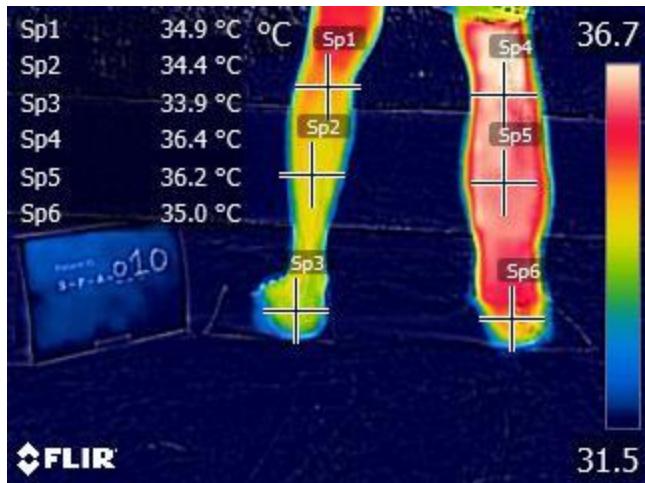

Participant 2.

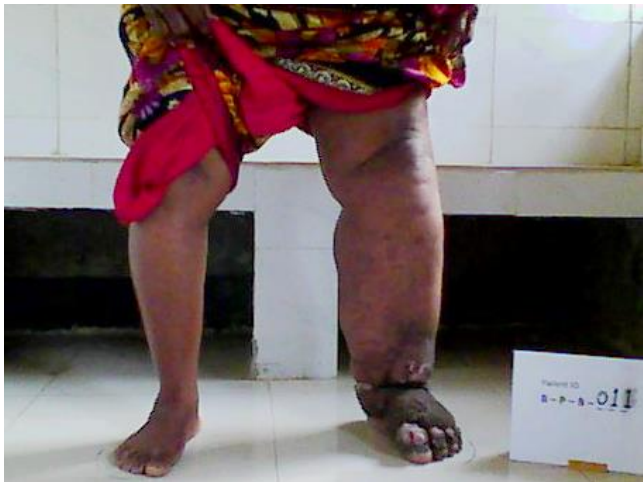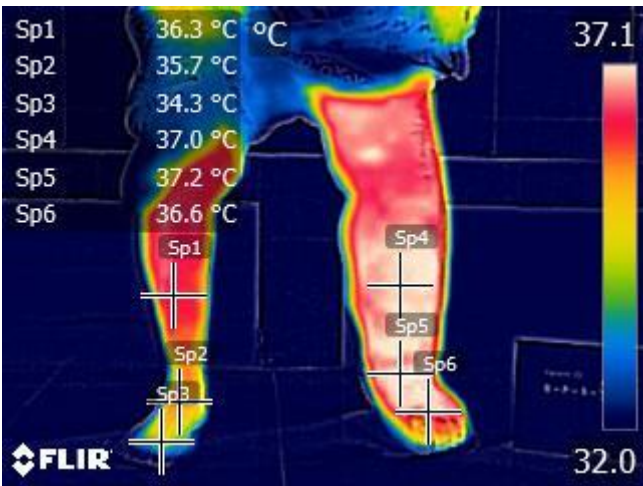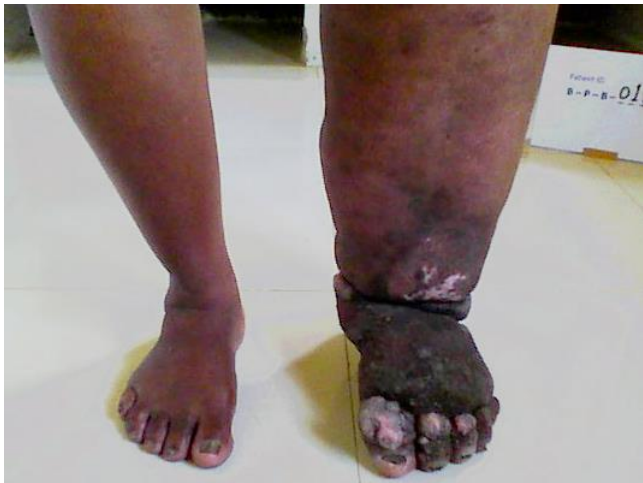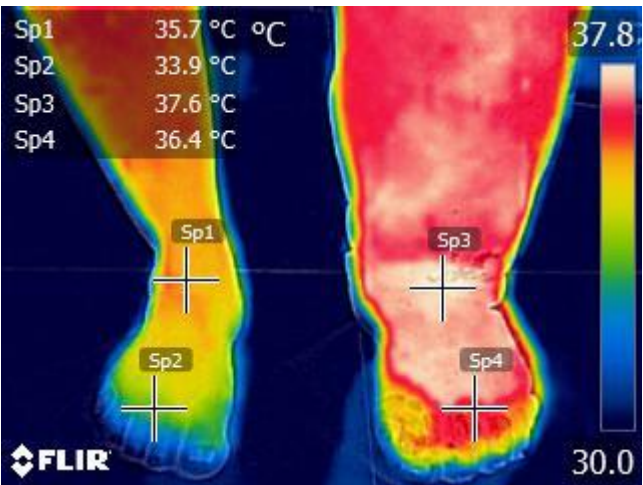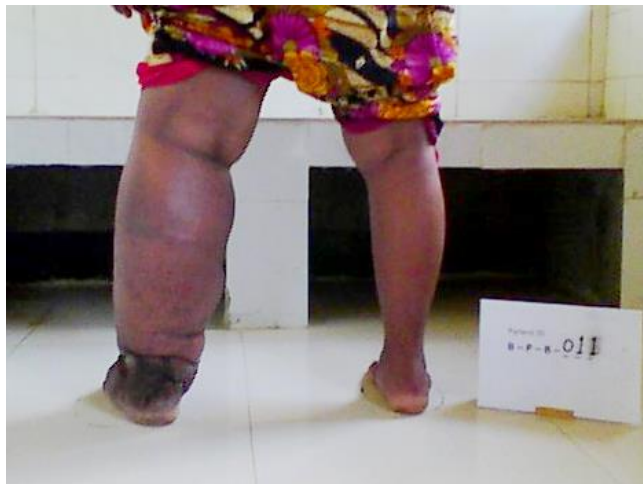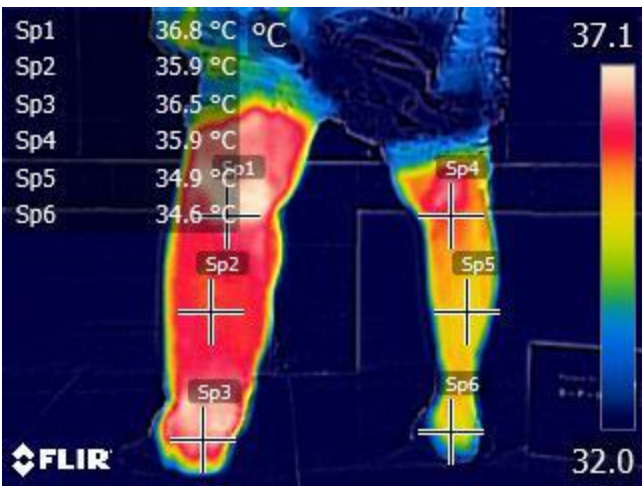



Participant 3.

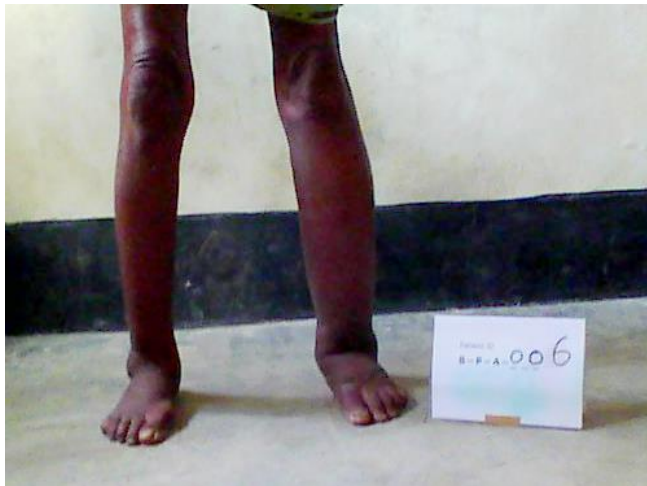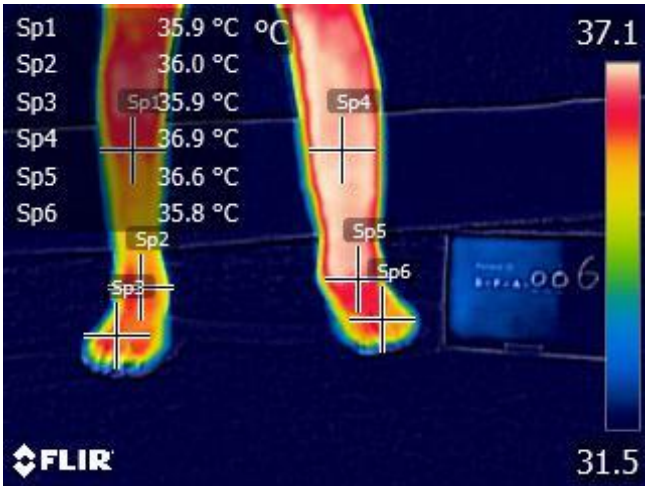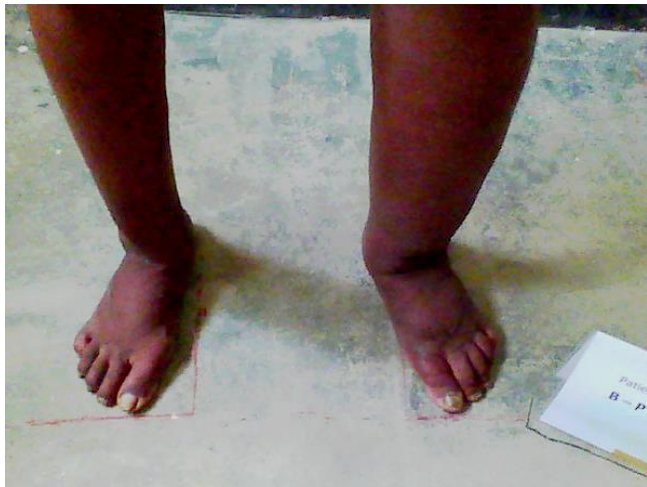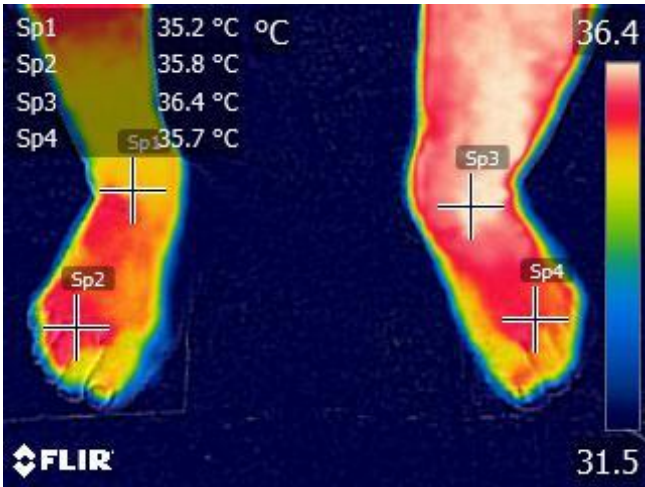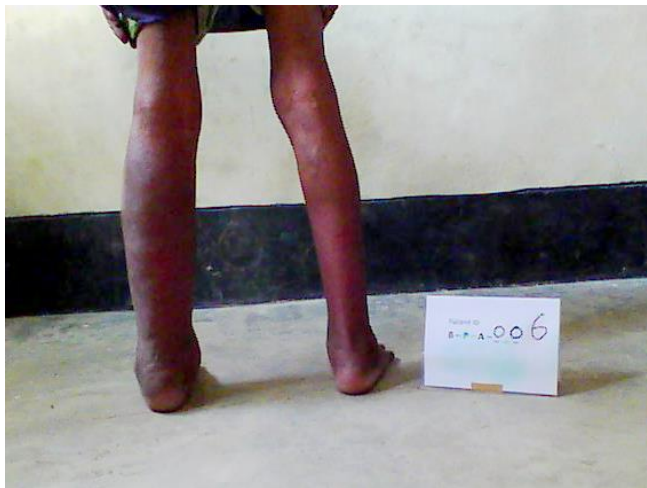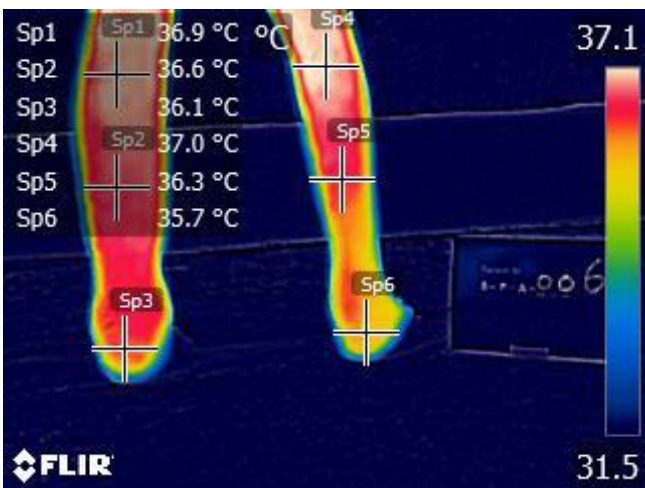



Participant 4.

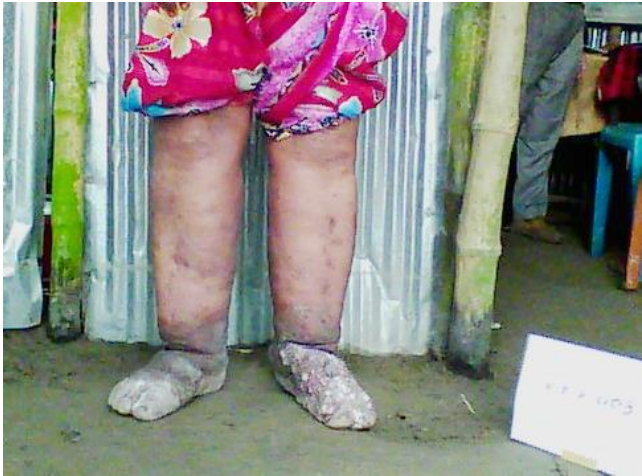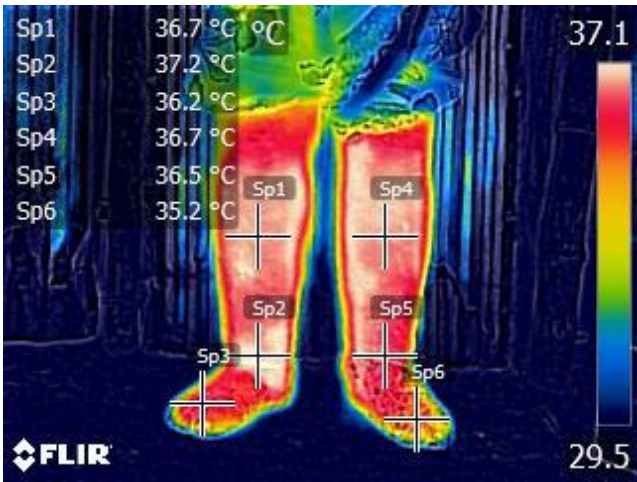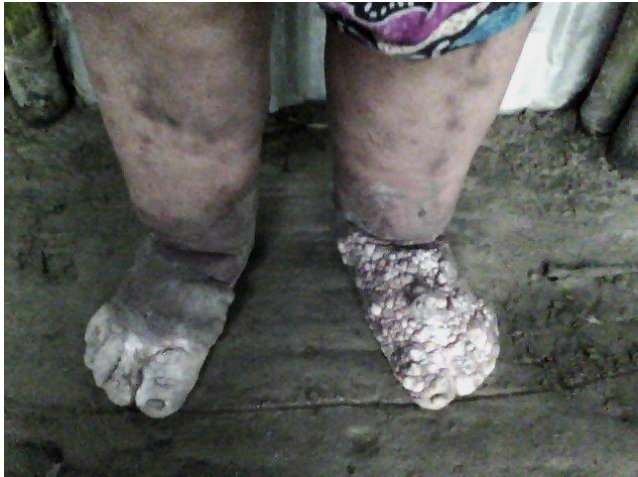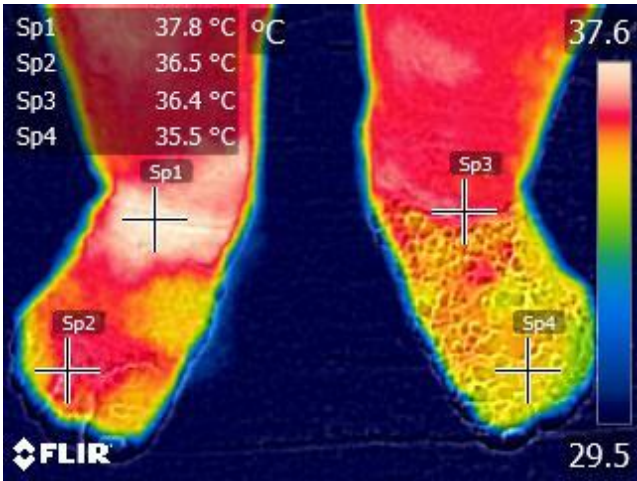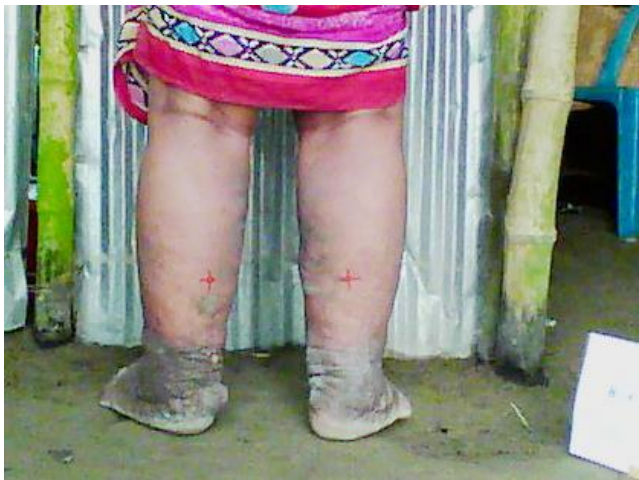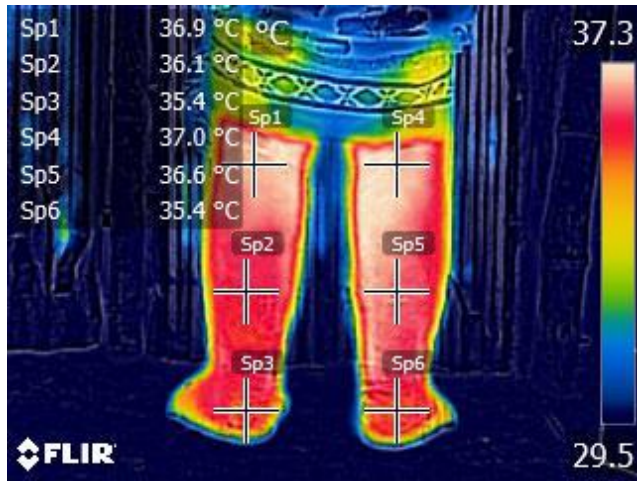

Supplement: s1 [file s1]
